# Supplementary material
Source: PubMed Central journal article supplement (PMC3921389)
Supplement: supp_00584.2012_legends.pdf [file supp_00584.2012_legends.pdf]

**Supplemental material captions:**

S1. Audio file of orange23blue58 recorded song prior to lesions (spectrogram shown in Fig. 4A)

S2. Audio file of orange23blue58 recorded six days following bilateral HVC lesions (spectrogram shown in Fig. 4B)

S3. Audio file of orange23blue58 recorded one month following bilateral HVC, Area X lesions (spectrogram shown in Fig. 4C)

S4. Audio file of orange72white22 recorded prior to lesions (spectrogram shown in Fig. 4D)

S5. Audio file of orange72white22 recorded two weeks following bilateral HVC, DLM lesions (spectrogram shown in Fig. 4E)
